# Supplementary material for: A comparison of antibiotic resistance genes and mobile genetic elements in wild and captive Himalayan vultures
Source: PeerJ. 2024 Jul 9;12:e17710. doi: 10.7717/peerj.17710 (PMC11243982; doi:10.7717/peerj.17710)
Supplement: Supplemental Information 1 [file peerj-12-17710-s001.xlsx]

## Sheet: Table S1
Table S1. Summary of metagenome sequencing.
Samples	Total raw reads	Total raw bases	Total clean reads	Total clean bases	Total high quality reads	Total high quality bases
W1	46478822	6971823300	46112182	6903371911	21831720	3274758000
W2	61255800	9188370000	59279050	8856875353	27596402	4139460300
W3	56649786	8497467900	55015008	8215815719	27121262	4068189300
W4	52907100	7936065000	51417774	7681073094	25541494	3831224100
W5	54618586	8192787900	52973824	7911641123	27577282	4136592300
W6	49770530	7465579500	48326890	7216843364	21801758	3270263700
W7	47574166	7136124900	45785918	6828973144	20471516	3070727400
W8	53829866	8074479900	52243082	7799885863	24388038	3658205700
Z1	60485344	9072801600	59063552	8820126322	16755288	2513293200
Z2	77562128	11634319200	76262980	11367904557	5693884	854082600
Z3	58663404	8799510600	57179914	8530466623	19532958	2929943700
Z4	87649904	13147485600	85452320	12744669755	10326228	1548934200
Z5	44436082	6665412300	43662462	6505493910	6634368	995155200
Z6	44652608	6697891200	43399136	6449823350	38785966	5817894900
Z7	38012224	5701833600	36917434	5483458916	36406028	5460904200
Z8	35623956	5343593400	34322036	5097354092	30079430	4511914500
Z9	35209268	5281390200	33788382	5004309038	28679716	4301957400
Z10	35897916	5384687400	34741058	5155420795	28470546	4270581900
Z11	37253198	5587979700	36197204	5377642053	28557942	4283691300
