# Supplementary material for: A comparison of antibiotic resistance genes and mobile genetic elements in wild and captive Himalayan vultures
Source: PeerJ. 2024 Jul 9;12:e17710. doi: 10.7717/peerj.17710 (PMC11243982; doi:10.7717/peerj.17710)
Supplement: Supplemental Information 2 [file peerj-12-17710-s002.xlsx]

## Sheet: Table S2
Table S2. Summary of assembly statistics.
Samples	Number	Length	N50	N90	Max	Min
W1	128733	159267158	1409	581	215169	500
W2	34220	71868794	5302	685	411286	500
W3	34975	79149974	5112	739	621249	500
W4	40863	87490156	4487	725	327901	500
W5	37103	68562589	4172	629	266298	500
W6	30976	53361588	2534	663	387045	500
W7	29985	51994032	2723	653	300304	500
W8	50911	107238034	4990	698	391308	500
Z1	31611	49696450	2146	637	238310	500
Z2	19359	31743301	2766	611	200366	500
Z3	40567	64052594	2269	623	277809	500
Z4	29969	44165197	2008	615	94512	500
Z5	12799	16969001	1944	563	98915	500
Z6	26634	66682472	5932	805	329937	500
Z7	29393	60878676	3571	746	353860	500
Z8	49899	99583295	3965	685	536487	500
Z9	14791	32256231	5206	701	215658	500
Z10	30948	57025069	3400	657	222336	500
Z11	38567	66803240	2764	657	239281	500
