# Supplementary material for: A comparison of antibiotic resistance genes and mobile genetic elements in wild and captive Himalayan vultures
Source: PeerJ. 2024 Jul 9;12:e17710. doi: 10.7717/peerj.17710 (PMC11243982; doi:10.7717/peerj.17710)
Supplement: Supplemental Information 3 [file peerj-12-17710-s003.xlsx]

## Sheet: Table S3
Table S3. Abundances of 102 clinical ARGs in Himalayan vultures.
Gene	Z1	Z2	Z3	Z4	Z5	Z6	Z7	Z8	Z9	Z10	Z11	W1	W2	W3	W4	W5	W6	W7	W8
KsgA	0	0	0	0	0	0	0	2.99657	0	0	0	0	0	0	0	0	0.192711	0	0
aacA_aphD	1.07589	4.801	0.939165	0	0.588014	1.52217	1.46195	11.0032	0.37839	3.09472	2.83202	0.642398	0.39924	2.1353	1.95919	1.869	19.9167	15.3182	1.96207
aacC	0	0	0.885309	5.28108	0	0	0	0	0.112952	0	0.227967	0	0	0	0.129963	0	0	0	0
aadA	0	0	1.09998	66.866	1.29471	0	0.092007	0.11158	1.41031	0.069531	0	0	0	0	0	0	0	0	3.50266
aadD	0.21152	0	0	0	0	0	0	9.95624	0	0.05898	0	0	0	0	0	0	0	0	0
aadK	0	0	0	0	0	0.460682	0	0.806669	0.372187	0	0	0	0	0	0	0	0	0	0
aadK_1	5.92036	1.00021	3.70051	0.175512	0.490011	2.26374	12.8584	1.3099	2.11459	3.46254	6.85381	0.152952	5.78124	6.22244	5.78084	1.22375	5.70638	2.04964	5.84182
aadK_2	0	0.393524	1.26411	0	0	1.1517	0	0.806669	0.248124	0.124244	0.187793	0.361067	0.261797	0.066676	0	0	0	0.261279	0.866487
acrA	0.146131	0.241256	16.6447	157.084	3.59538	1.32741	1.12477	0.206059	3.65611	1.29489	1.68856	9.51837	5.2162	1.88033	2.05655	2.41789	1.96391	3.63077	28.927
acrB	1.52476	2.37468	16.7891	164.207	1.88164	1.45593	0.875728	0.609227	3.9061	1.0673	1.48369	13.8016	5.56606	5.75681	7.32229	3.55491	5.01665	4.6053	30.6052
acrE	0.140831	0	17.2108	184.642	3.29044	1.48516	0.81495	0.127479	2.78401	0.314152	0.989236	13.9226	5.9162	2.57099	1.8949	5.02181	3.94608	3.57848	33.1126
acrF	0.157567	0.556637	19.6679	195.366	3.13607	1.20533	0.479212	0.047543	4.35376	0.248927	1.03301	17.5481	6.92788	2.86082	2.56966	8.17643	4.26857	6.64429	36.3792
ampC	0.429163	0.252684	16.4293	181.016	2.22826	1.95311	1.21006	0.517967	5.54192	0.359634	2.06645	15.312	6.68202	5.41076	4.69706	3.54416	59.3732	62.9138	35.4915
ant1	2.11402	7.11259	2.63625	0	1.04536	3.62199	11.4715	0.242997	1.62567	2.07718	3.95987	0.815743	5.97381	9.46008	9.22352	0.712	7.94254	3.62049	6.6915
aphA	0	0	0	0	20.7691	0	0	4.45647	0	0	0	0	0	0	0	0	0	0	0.145059
aphA1	0.199855	0	0.174458	17.6544	1.55651	0	0	0	0.333873	1.05882	0	0	0	0	0	0	0	0	0
arnA	0.16448	1.16212	17.1935	103.007	2.7755	0.884287	0.933499	0.248143	3.22862	0.206385	1.80235	10.6627	6.1849	2.01823	1.10655	3.9747	3.24431	5.30463	32.9158
arr	0.280209	0	1.1007	3.64775	0	0	0	0.169096	0.390093	0	0	0	0	0	0	0	0	0	0
asmA	0.087962	0	16.2782	113.936	2.96861	1.10951	1.25296	1.08818	2.71853	0.735817	2.07605	10.1215	5.76249	1.94806	1.60624	3.34398	2.56199	4.53898	25.2538
bacA	0.205911	2.42778	17.2384	169.47	5.59137	0.970415	1.17738	0.354006	4.24827	0.930101	2.08779	11.0941	5.22746	2.7505	2.06725	4.09396	3.38944	2.98121	26.7623
baeS	0.23231	0.615512	14.398	112.314	0.603091	1.03279	1.44773	0.700952	3.00771	0.680159	1.82763	7.71818	5.52794	1.7729	1.78616	2.73846	2.441	4.04126	28.7072
bcr	0.068464	1.69305	11.7137	116.669	3.19927	1.67052	0.57904	0.37184	4.4612	0.41999	0.923353	9.54234	5.6316	1.84408	2.01786	3.95578	3.18046	2.83699	25.5639
bctl	0	0.481303	0	0	0	11.6351	2.18326	0	0.758676	0	1.07185	0.552007	0.720433	1.264	1.35305	0	1.35622	1.75758	11.1757
bglY	0	2.10263	0	6.27231	0	0	0	0	0	0	0	0.321534	0.116566	2.13752	3.30504	0	1.02404	0.620458	0.420882
bla	0	0	2.11261	16.099	0	0	0.414345	0	0.622011	0	0.104615	0	0	0.111431	0.059641	0	0	0	4.73924
blaT	0	0	5.12554	104.089	0	0	0.885284	0	1.42391	0.158444	0.372532	0	0	0.056686	0.485436	0	0	0	27.1896
bleO	0	0	0.777911	0	0	0	0.396685	0	0	0	0	0	0	0	0	0	0	0	9.61013
blt	0.081135	0	0	0	0	1.47638	0	0	0	0.045247	0.091187	0	0	0	0	0	0	0	0
btuR	0	0	11.0803	96.7329	0	1.48354	0.798403	0.582822	3.07322	0.846376	0.930384	6.70814	4.13426	0.412917	0.884012	2.35827	0.915621	2.48104	22.635
cepA	0	0	0	0	0	0	0	0	0	0	0	0	0	0.05405	0.057857	0	0	0	1.66022
cfxA	0	0.965024	0	0	0	0	0	0	0	0	0	0	0	0	0	0	0.201426	0	1.15901
cmlA1	0	0	1.86421	4.69369	0	0	0.057614	0	0	1.04661	0	0	0	0	0.082929	0	0	0	2.97456
cmr	0.198396	0.46725	14.4898	117.206	0	1.01193	1.23638	0.478899	3.60897	0.811367	1.22636	10.3963	4.39067	2.73128	1.31354	3.23518	3.16965	3.36081	28.7135
cmx1	0.899443	3.25751	0.337903	2.66766	0	0	0	1.05099	0	0.069852	0.294278	0	0	0	0	0	0	0.195859	0
cpxA	0.474765	0.419301	20.3141	263.548	4.62194	2.25795	0.925766	1.32508	5.06064	0.728105	2.30107	15.9658	6.24139	3.69742	3.156	4.65209	3.85085	4.54709	37.3974
cpxR	1.16654	7.82995	16.5982	201.105	3.0284	1.06135	1.19431	0.774356	3.89758	2.0167	2.22879	8.31848	4.24942	4.81783	8.44592	4.46909	6.1072	4.37782	25.6545
crp	46.5028	9.55648	173.281	226.865	3.34415	0.958917	0.745428	0.155472	11.1903	14.9423	6.73206	7.91032	19.138	20.4325	17.9928	2.2018	67.4397	77.3484	35.6167
dfrA	0.327474	4.62746	0.571717	94.0913	1.70028	0	0	0	0	0	0	0	0	0	0	0	0	0	1.04206
dhfrI	0	0	10.8797	70.8151	0	0.21343	0.344044	0	4.01625	11.3887	1.2567	0	0	0	0.273239	0	1.64902	3.90044	15.5858
eefA	0	0	0.82471	1.757	0	0	0.03235	0	0.323756	0	0	2.94453	5.03854	0.087	0.186257	2.57005	0.910997	1.07958	0.411129
eefB	0	0.185367	0.412233	1.17098	0.817316	0	0.163498	0	0.292193	0.102418	0.058972	2.59368	3.60703	0.031407	0.084049	2.28857	0.348219	0.738441	0.463809
emrA	0.13903	0	14.1387	137.551	3.60929	1.43742	1.57811	0.461445	3.56132	0.542735	1.6016	9.35079	4.12514	2.20525	1.55889	2.49928	2.30661	3.42402	33.1316
emrB	0.197559	3.83222	17.3438	155.336	0.275094	1.27087	0.77829	0.319732	4.01255	1.094	1.80003	9.87546	4.53663	5.16397	5.09599	3.27894	5.04283	3.97819	30.798
emrD	0.133237	0	26.1245	262.078	3.51054	1.16535	1.34772	1.01104	4.42009	0.302759	2.20871	11.8005	6.63823	2.29072	2.14057	5.39684	3.82642	5.58087	35.034
emrE	0	0.721954	1.96232	17.8626	1.06108	1.26774	1.09163	0	1.13801	0.341906	0.229681	1.65602	0	0.244645	0.26188	1.80676	0.753456	0.958677	3.03478
emrK	0	0.742422	16.0214	84.8103	2.18232	1.10089	0.686019	0.76093	2.76966	0.820397	1.0235	12.3749	5.35064	1.92879	1.61583	2.80762	1.75625	3.50527	35.1711
envZ	1.00588	4.37468	19.6285	236.278	4.69368	1.52035	1.39499	0.327318	4.62969	1.0971	1.49013	15.0473	6.50098	7.40613	8.16692	5.41395	5.89873	5.71935	35.7002
erm	43.4042	170.826	82.0304	29.584	212.779	51.8464	41.924	29.1808	8.97576	39.0108	42.2102	15.1956	1.54744	3.97264	2.7675	3.35302	30.9951	24.2983	9.61013
ermA	11.3118	192.04	13.4606	2.26948	6.3221	5.45582	101.182	28.5974	50.9035	19.2997	75.1219	0.716262	1.03867	1.58721	1.62824	0.260487	7.33873	7.52783	18.9135
ermC'	13.6179	1.18057	2.43097	0.207162	6.36212	1.69858	0	0	1.68999	4.53492	4.35039	0	0	0.37486	0.080254	0.352785	0.626073	1.22974	1.75221
evgA	0.132587	0.936779	13.6571	67.3144	2.06522	0.657989	1.2394	0.160022	3.32245	0.591525	1.93717	10.5291	4.20663	1.42849	1.44417	2.10995	1.46648	3.42084	28.3147
evgS	0.158816	0.24045	15.2498	79.3232	2.94498	1.29483	1.23211	0.602421	3.37329	0.442841	1.69567	13.2739	5.35875	2.09133	1.67173	2.17968	3.74741	3.93794	33.5312
gadX	0.190072	0	1.16143	4.065	0	0	0.042304	0	0.105843	0.158998	0	7.23901	0.111676	0.227537	0.182675	2.46461	0.84092	1.26315	0.940852
hns	0.393917	0	8.08069	78.7515	1.02263	0.570178	0.263019	0	2.85163	0.109839	1.54952	11.8105	3.24021	0.707344	1.64055	2.55391	1.74278	3.07981	14.6241
macA	0.073065	0	13.9055	117.077	1.51745	0.453252	1.20338	0.440921	3.62115	0.162987	1.76552	9.23632	4.85098	1.22454	1.54488	2.45467	2.74768	2.62777	25.5753
macB	0.230342	0	0.073116	43.5767	0	0	0	0	0	0	0	0	0	0	0	0	0	0	0
mdtA	0.29803	1.05285	14.2045	118.453	2.16637	1.35578	1.11437	0.467609	3.21963	0.598335	1.94272	11.008	4.06244	1.64116	1.52764	3.59448	3.1524	2.58001	26.2593
mdtB	0.130549	0.276714	14.6096	116.487	1.62678	1.53331	1.48766	0.866595	4.20191	0.582433	1.52591	9.94407	5.75274	1.57845	1.37179	3.04703	2.79162	3.38868	26.7348
mdtC	0.158949	0.28076	13.1581	119.668	0.550188	1.97204	1.35611	0.511572	3.65851	0.546628	1.51845	10.2183	4.90295	1.99794	1.57856	3.66929	2.67616	3.29324	26.5449
mdtD	0	0	12.5166	118.337	0.59798	2.11953	1.40983	0.59076	2.85396	0.738623	2.07102	9.70596	5.00742	2.27489	1.84481	4.92139	3.01478	3.19661	26.3464
mdtE	0.492907	0.746269	17.5796	196.657	3.29044	1.57252	1.31646	0.509915	3.84272	1.1388	2.3346	13.9226	5.79208	2.02308	2.25583	4.9803	3.94608	4.07397	33.013
mdtF	0	0	1.36543	68.6539	0	0	0	0	0.029163	0.029206	0.058859	0	0	0.031347	0	0	0	0	0
mdtG	0	0	12.3234	103.383	3.45045	1.42913	0.857867	0.24062	3.14554	0.852396	1.41908	8.72386	3.70932	1.78998	1.53286	1.95843	2.00909	4.26053	24.2485
mdtH	0.607005	1.19131	13.2455	102.69	0.700364	0.948342	1.26093	0.488405	3.75499	0.677024	1.44021	8.96305	4.08156	4.48102	4.7967	2.94163	3.68016	4.2185	21.3664
mdtK	0.21152	1.00257	15.8236	129.542	1.23252	1.01791	1.27242	0.19927	4.12331	0.430244	2.12836	8.00758	5.90126	2.11084	1.73402	3.44759	2.82139	4.54474	30.9419
mdtL	0	0	5.81384	158.31	1.07728	0	0	0.083472	1.26345	0.03857	0.116594	2.24174	0.08127	0.548385	0.600833	1.61519	0.541771	0.969815	11.1884
mdtO	0.238424	0.56152	18.3844	119.57	1.85688	1.64337	1.39739	0.743378	4.60264	0.421051	1.36214	12.3005	5.90688	2.25957	2.62244	4.47342	4.04355	5.21946	33.3545
mecA	0	0	0	0	0	0	0	3.53206	0	0	0	0	0	0	0	0	0	0	0
ompF	0	0.793553	13.0088	112.983	1.16631	0.928979	0.666605	0.316297	3.25228	0.417571	1.59891	11.4069	5.19122	1.52381	1.82306	3.35405	3.36793	3.80522	29.9158
rsmA	0.198396	1.05131	17.5782	172.12	3.09029	1.02561	1.19223	0.478899	3.25912	0.442564	1.95103	15.4336	5.82832	2.90941	2.28811	6.08058	2.41381	4.42076	37.1077
sdiA	0	0	10.5341	91.9007	1.17115	1.44589	0.853448	0.544474	1.75849	0.314478	0.443637	6.5801	4.50595	2.43021	1.15619	1.26299	1.66323	1.49901	26.1587
strA	0	1.43313	2.65593	7.16718	0	0	0.27087	0.428418	0.395333	0	0.227967	0	0	24.3427	21.7688	0	1.94437	2.5374	0.071717
strB	0.292261	1.03247	3.9969	9.42103	1.01164	0	0	0.470316	1.51898	0.054329	0	0	0	23.8494	17.4775	0	1.6522	2.81819	0.06889
sulI	0	0.685856	10.931	16.2912	0	0.08029	0.442578	0.702955	5.03373	17.8646	1.69103	0	0	2.73085	2.11468	0	46.3827	61.0957	9.11922
sulII	0.729008	0	14.7108	53.9529	0	0	0.222406	0.509136	0.572892	0	0	0	5.87242	26.2863	21.6564	0	5.31268	6.18526	8.77887
tetA	7.45854	1.41539	197.437	250.408	2.7514	0.189601	0.83394	1.73904	7.27513	23.7794	2.75375	0.219155	0.538734	29.5078	26.6918	0	65.8335	80.0173	33.9348
tetC	0	0	0.212792	0.68001	0.63284	0	0	0	0.067873	0.067972	0	0	0	0.14591	0.468566	0	1.52786	2.66825	3.10282
tetD	0	0	0.512078	0.363651	1.01527	0	0	0	0.108889	0	0	0	0	0.234085	0.250576	0	1.44186	1.83459	1.1062
tetL	228.22	38.2824	54.069	2.53288	34.7428	84.3171	206.762	188.358	121.2	268.217	169.576	12.4761	69.9322	82.6915	55.2994	99.4705	81.9143	112.365	118.504
tetM	36.0407	8.93236	7.22721	0.276972	3.9074	17.9351	0	27.7191	0.497609	4.67759	6.37264	0.736911	0.56878	1.86326	1.71042	12.3279	1.63896	6.94242	10.6848
tetM2	0.281176	0.662206	0.327259	0	0.973264	3.37219	0	0.05656	0	0.156805	0	0	0	0.0561	0.060052	0	0.760211	0.879339	0.331384
tetM_1	66.9589	19.0084	11.0873	0.692431	17.835	54.9054	78.2284	76.497	47.6503	96.8665	66.7231	1.20685	24.5013	25.852	17.1765	34.6734	27.7292	34.0593	45.2861
tetP	86.447	35.8957	24.1254	1.41113	25.102	50.3621	68.1232	49.2807	41.7979	74.5075	53.8898	1.35283	32.0742	25.6499	18.3101	50.1489	28.8755	37.2502	61.9455
tetP/tetQ	563.152	454.777	269.593	29.9161	279.388	360.052	91.2111	42.669	2160.65	256.684	706.682	11.0915	107.589	303.581	317.087	439.001	948.223	1011.01	345.413
tetQ	7.65957	1.86356	1.31919	0	0	0.098348	0	1.29238	2.47607	2.62293	2.38773	0	0	0.046219	0.129606	0.280327	0	0.185929	0.439689
tolC	0.165063	0.777489	19.4521	182.892	4.5708	1.47903	0.832716	0.597654	3.86087	0.245471	1.3608	14.8914	7.49989	2.07478	2.96126	5.67509	3.12394	5.63548	37.4678
uppP	40.8644	52.5232	46.1997	14.0172	48.5834	96.6436	3.6296	4.19083	3.45044	26.8979	20.4373	31.7665	24.082	12.9752	21.4156	8.17371	27.4304	6.52257	12.6943
uppP_2	0	5.14392	0.169473	0	0	0.08029	2.53818	0	0	0	0	0.471966	0.285171	1.10396	1.31249	0	0	0	0
ybaL	0	0	17.0958	159.433	1.9087	1.66119	0.894267	0.850923	3.34692	0.451718	1.23823	12.2374	4.74664	2.27932	2.1071	3.54819	2.97581	3.18033	31.1139
ybjZ	0.083761	0.887703	14.8426	87.9028	1.08724	1.54147	0.87619	0.353824	3.89467	0.513824	1.64741	8.8236	5.75791	1.15311	1.87835	3.4064	2.56314	3.86376	28.8452
ycbJ	4.3955	10.7745	1.801	0	0	3.4501	12.019	0.270665	1.049	1.15059	5.44413	0.43614	0.579755	3.22157	3.16114	1.42752	1.12446	0	3.55226
yceL	0	0	0	2.83444	0	0	0	0	0	0	0	0	0	0	0	0	0	0	0
ydhE	0	0	0.259304	4.41945	0	0	0	0	0	0	0	0	0	0	0	0	0	0	0
yegN	0	0	0	0.584364	0	0	0	0	0	0	0	1.78238	0	0	0	0.092601	0.231699	1.47404	0
yfbG	0	0	0.374271	50.4337	0	0.034011	0	0	0	0.045863	0.046214	0	0	0	0	0	0	0	0
yhiV	0.209482	0.647533	19.6134	133.813	4.98811	1.46193	1.38706	1.10613	5.03839	0.963792	1.95705	15.4406	5.89244	2.61745	2.28174	3.84294	4.07403	4.40163	32.867
yhiX	0.197675	0.698327	19.7575	127.931	4.61858	1.18538	2.77174	0.89467	4.293	0.165358	1.8884	10.0915	5.22642	2.42555	2.15313	0.407781	2.69655	4.48196	38.8599
yidY	0	0	19.7315	128.819	1.80004	0.974954	1.01853	0.585796	3.62945	0.309343	0.545493	14.6085	7.69963	2.44864	2.31016	4.08673	4.95935	4.82477	25.7904
yjcP	0.055583	0.19636	19.2748	216.524	3.17455	1.67805	1.31133	0.436052	4.36425	0.805937	2.31137	15.2239	5.3232	2.99428	2.81347	4.94686	4.71334	5.21489	37.3007
yjcQ	0	0	0.38475	2.73229	0	0	0	0	0	0	0	0	0	0	0	0	0	0	0
yjcR	0.158025	1.11773	17.6971	198.509	1.64097	1.76509	1.30179	0.667742	5.6742	0.659633	2.28692	14.3096	5.57099	2.10487	2.53192	4.3968	3.9218	6.06093	31.2984
yjiO	0	0.233625	16.6834	153.733	2.06019	1.55892	1.53076	0.678439	4.52963	0.442564	1.67231	9.11012	5.94489	1.74168	1.65252	0.272846	3.41347	2.53354	22.7276
