# Supplementary material for: A comparison of antibiotic resistance genes and mobile genetic elements in wild and captive Himalayan vultures
Source: PeerJ. 2024 Jul 9;12:e17710. doi: 10.7717/peerj.17710 (PMC11243982; doi:10.7717/peerj.17710)
Supplement: Supplemental Information 4 [file peerj-12-17710-s004.xlsx]

## Sheet: Table S4
Table S4. Abundances of Rank I ARGs in Himalayan vultures.
Gene	Type	Subtype	W1	W2	W3	W4	W5	W6	W7	W8	Z1	Z2	Z3	Z4	Z5	Z6	Z7	Z8	Z9	Z10	Z11
gi|446961539|ref|WP_001038795.1|	MLS	ermB	0.716262	1.03867	1.58721	1.62824	0.260487	5.78446	4.49201	17.5014	0.994401	0	0.096448	0	3.44203	0.959567	1.03283	13.8019	0.369161	0.801023	0.062089
JQ861959.1.gene5.p01	Aminoglycoside	aadE	0.152952	5.26775	5.53595	4.6561	1.22375	5.70638	1.91846	4.13769	1.22689	1.00021	1.56527	0.175512	0.490011	2.26374	12.1829	1.3099	1.83939	1.10526	4.667
gi|499589362|ref|WP_011270145.1|	Sulfonamide	sul2	0	3.58142	15.3717	13.5735	0	3.53681	3.04697	4.80506	0.499638	0	10.2058	33.2647	0	0	0.222406	0.301512	0.445165	0	0
AAR05762	MLS	mphA	0	0	3.33998	2.13363	0	51.2994	55.8006	4.2641	0	0	0.235691	48.0368	0	0.037221	0.400625	0	5.36261	21.5823	1.51727
AF118110.1.gene1.p01	Beta_lactam	CfxA2	0	0.843116	10.6102	16.3874	0	2.11623	0.527967	38.918	0	0.894595	0.294736	0	0	0	0	0	0	0	0
GQ152602.1.gene1.p01	Beta_lactam	MOX-7	0	0	3.44069	2.95555	0	55.3115	57.0384	2.15789	0	0	0	0	0	0	0	0	0	0	0
JQ861959.1.gene5.p01	Aminoglycoside	aadE	0	0.119176	0.485639	0.909741	0	0	0	0.28687	0	0	0	0	0	0	0.451451	0	0	0	0.227967
ZP_04668102	Tetracycline	tetO	0	4.01735	1.42353	0.789119	3.85481	4.38417	9.46319	26.3978	11.8064	8.55177	10.4544	0.157961	8.5997	12.0837	4.68832	61.9698	0.567585	0.40263	2.07628
AAA27431	MLS	ermF	0	0	0	0	0	1.1012	0	1.54889	0	0	0	0	0	0	0	0	0.443534	0.388662	0.055948
AAX84025	MLS	ermT	0	0	0	0	0	1.55427	3.03581	1.4121	10.3174	192.04	13.3642	2.26948	2.88007	4.49626	100.149	14.7955	50.5343	18.4987	75.0598
BX664015.1.gene215.p01	Tetracycline	tetA	0.219155	0	0.08094	0.086642	0	2.2435	2.5374	1.86465	0	0	0.236082	1.2574	0.351053	0	0.18058	0	0.075301	0.075412	0
CAI84881	Tetracycline	tetL	12.4761	69.9322	82.6915	54.9769	99.4705	81.9143	112.365	118.504	228.22	38.2824	54.069	2.53288	34.7428	83.4844	206.314	188.358	120.92	268.217	169.576
ABA08387	Trimethoprim	dfrA1	0	0	0	0	0	1.64902	3.90044	5.83907	0	0	8.40931	6.39841	0	0.21343	0	0	3.64021	11.1285	1.2567
ZP_04543532	Beta_lactam	CfxA3	0	0	0	0	0	0.201426	0	1.15901	0	0.965024	0	0	0	0	0	0	0	0	0
YP_001966247	Aminoglycoside	aac(3)-II	0	0	0.113372	0	0	0	0	4.48696	0	0	1.73607	48.7862	0	0	0	0.171452	0.105475	0	0.319313
AF133140.gene.p01	Tetracycline	tetG	0	0	0	0	0	0	0	3.82444	0.069338	0.489897	0	0	0.360008	0	0	0	0	0	0
ZP_04543532	Beta_lactam	CfxA3	0	0	0	0	0	0	0	1.2501	0	0	0	0	0	0	0	0	0	0	0
BAD46890	Tetracycline	tetQ	0	0	0	0	0	0.81251	0	1.47182	0	0	0	0	0	0	0	0	0	0	0
U12338.3.gene8.p01	Chloramphenicol	cmlA	0	0	0	0.082929	0	0	0	2.97456	0	0	1.86421	4.69369	0	0	0.057614	0	0	1.04661	0
YP_210868	Beta_lactam	blaA	0	0	0.05405	0.057857	0	0	0	1.66022	0	0	0	0	0	0	0	0	0	0	0
Y10278.1.gene1.p01	Beta_lactam	CTX-M	0	0	0.111431	0.059641	0	0	0	4.73924	0	0	2.11261	16.099	0	0	0.414345	0	0.622011	0	0.104615
HQ451074.1.gene4.p01	Beta_lactam	TEM-1	0	0	0.056686	0.485436	0	0	0	27.1896	0	0	5.12554	104.089	0	0	0.885284	0	1.42391	0.158444	0.372532
AAW21254	Trimethoprim	dfrA12	0	0	0	0	0	0	0	1.04206	0.327474	4.62746	0.571717	94.0913	1.70028	0	0	0	0	0	0
ACA42497	Tetracycline	tetS	0	0	0	0	0	0	0	0	1.42833	0.593632	0.036671	0	0.436239	5.78537	0	3.47313	0.584837	2.38964	1.6525
YP_009182146.1	Multidrug	qacEdelta1	0	0	1.68299	0.300259	0	25.398	32.4256	6.1306	0	0	8.79509	22.6592	0	0	0.104301	0.424197	3.91438	10.8457	1.05337
AF002716.gene.p01	MLS	erm(TR)	0	0	0	0	0.131311	0.164278	0.348372	0.866487	13.3674	1.18057	2.43097	0.207162	6.36212	1.33598	0	0	0.992498	4.53492	4.06884
AAL05554	MLS	lnuB	0	0	0	0	0	0	0	0	0.709933	2.86627	0.619716	0	0.526579	0.251656	10.6542	30.7237	2.03314	1.52709	2.45065
X04555.1.orf0.gene.p01	Aminoglycoside	ant(2'')-I	0	0	0	0	0	0	0	0	0	0	0.156094	0	0	0	0	0	0	0.79778	0
JQ861959.1.gene5.p01	Aminoglycoside	aadE	0	0	0	0	0	0	0	0	1.63737	0	0.285859	0	0	0	0	0	0	1.64362	0.460054
AJ011293.1.gene1.p01	Beta_lactam	CMY-6	0	0	0	0	0	0	0	0	0	0	0	0	0	0	0	0	0	0	0.617123
JQ861959.1.gene5.p01	Aminoglycoside	aadE	0	0	0	0	0	0	0	0.349459	1.72966	0	0.97062	0	0	0	0	0	0.275193	0.620093	1.3191
JQ861959.1.gene5.p01	Aminoglycoside	aadE	0	0	0	0	0	0	0	0	0.319768	0	0	0	0	0	0	0	0	0	0.179692
JQ861959.1.gene5.p01	Aminoglycoside	aadE	0	0.394311	0.200851	0.215	0	0	0.131177	1.06779	1.00668	0	0.878751	0	0	0	0.224053	0	0	0.093567	0
gi|426206800|emb|CCP09090.1|	Beta_lactam	OXA-10	0	0	0	0	0	0	0	0	0	0	1.59952	1.51453	0	0	0	0	0	0	0
V01499.1.gene1.p1	Aminoglycoside	aph(4)-I	0	0	0	0	0	0	0	0	0	0	0.497754	7.42305	0	0	0	0	0	0	0
NC_010410.6003052.p01	Rifamycin	arr	0	0	0	0	0	0	0	0	0.280209	0	1.1007	3.64775	0	0	0	0.169096	0.390093	0	0
gi|447129061|ref|WP_001206317.1|	Aminoglycoside	aadA	0	0	0	0	0	0	0	1.41066	0	0	0.435344	15.999	1.29471	0	0	0	0.277717	0.069531	0
NC_010558.1.6275994.p01	Aminoglycoside	aadA	0	0	0	0	0	0	0	0	0	0	0.180428	15.1835	0	0	0.092007	0	0	0	0
gi|241992581|gb|ACS73641.1|	Aminoglycoside	aadA	0	0	0.124666	0	0	0	0	1.32553	0	6.62206	1.09086	89.2811	1.0814	0	0.139068	0.439908	0.115982	0.116152	0
AJ459418.gene.p01	Sulfonamide	sul3	0	0	0	0	0	0	0	1.01926	0	0	0	7.0843	0	0	0.183316	0	0.114664	0	0
CAA67773	Aminoglycoside	aph(3''')-III	0	0	0	0	0	0	0	0.145059	0	0	0	0	20.7691	0	0	4.45647	0	0	0
NC_010426.6155849.p01	Chloramphenicol	cat	0	0	0	0	0.369124	0	0.195859	1.15144	0	0	0	0	1.30068	10.8262	0.223021	4.61078	0.278997	0	0.281545
CAI84881	Tetracycline	tetL	0	0	0	0.322501	0	0	0	0	0	0	0	0	0	0.83264	0.448107	0	0.280289	0	0
ZP_04556181	Aminoglycoside	aadE	0.361067	0.261797	0.066676	0	0	0	0.261279	0.866487	0	0.393524	1.26411	0	0	1.1517	0	0.806669	0.248124	0.124244	0.187793
AAL91930	MLS	ermB	0	0	0	0	0	0.192711	0	0	0	0	0	0	0	0	0	2.99657	0	0	0
P12055	Aminoglycoside	SRP	0	0	0	0	0	0	0	0	0	0	0	0	0	0.460682	0	0.806669	0.372187	0	0
gi|499589362|ref|WP_011270145.1|	Sulfonamide	sul2	0	2.291	10.9146	8.08293	0	1.77587	3.13829	3.97381	0.22937	0	4.50499	20.6882	0	0	0	0.207624	0.127727	0	0
