# Supplementary material for: A comparison of antibiotic resistance genes and mobile genetic elements in wild and captive Himalayan vultures
Source: PeerJ. 2024 Jul 9;12:e17710. doi: 10.7717/peerj.17710 (PMC11243982; doi:10.7717/peerj.17710)
Supplement: Supplemental Information 5 [file peerj-12-17710-s005.xlsx]

## Sheet: Table S5
Table S5. Abundances of Rank II ARGs in Himalayan vultures.
Gene	Type	Subtype	W1	W2	W3	W4	W5	W6	W7	W8	Z1	Z2	Z3	Z4	Z5	Z6	Z7	Z8	Z9	Z10	Z11
gi|447196024|ref|WP_001273280.1|	Multidrug	mdt	2.4817	0	0	0.163521	4.13661	0.376374	1.69606	0	0	0	0	0	0	0	0	0	0.142118	0	0
CP000034.1.gene3834.p01	Unclassified	cpxR	7.56225	3.97527	1.74559	2.24228	4.46909	3.52669	3.10096	25.1596	0	0.824205	16.4964	115.847	3.0284	1.06135	1.14238	0.774356	3.89758	0.65055	1.70437
NC_002695.1.913113.p01	Unclassified	H-NS	11.8105	3.24021	0.707344	1.64055	2.55391	1.74278	3.07981	14.6241	0.393917	0	7.73683	42.4892	1.02263	0.570178	0.263019	0	2.85163	0.109839	1.54952
ZP_03064581	Multidrug	mdtN	10.3723	5.43152	1.89173	2.07563	1.76965	2.44698	3.58296	21.8463	0.158025	0.279128	13.5185	83.3151	1.64097	1.3724	0.984792	0.524491	3.43191	0.440634	2.08683
CAV31157	Tetracycline	tetM	9.15417	55.9685	65.94	45.5512	85.2814	68.487	95.0968	95.4406	186.907	47.5599	53.7178	1.10573	42.9985	88.5376	196.72	179.887	104.956	240.488	156.008
A1ADA7	Polymyxin	arnA	10.6627	6.1849	2.01823	1.10655	3.9747	3.24431	5.30463	32.9158	0.16448	1.16212	17.1935	103.007	2.7755	0.884287	0.933499	0.248143	3.22862	0.206385	1.80235
ZP_02775049	Multidrug	mdfA	10.3963	4.39067	2.73128	1.31354	3.23518	3.16965	3.36081	28.7135	0.198396	0.46725	14.1434	86.2135	0	1.01193	1.23638	0.478899	3.60897	0.811367	1.22636
A1A9U9	Multidrug	mdtG	8.72386	3.70932	1.78998	1.53286	1.95843	2.00909	4.26053	24.2485	0	0	11.7761	63.1534	3.45045	1.42913	0.857867	0.24062	3.14554	0.704153	1.41908
NP_756186	Multidrug	mdtE	13.9226	5.79208	2.02308	2.25583	4.9803	3.94608	4.07397	33.013	0.422492	0.746269	17.3952	125.976	3.29044	1.57252	1.31646	0.509915	3.84272	1.06026	2.3346
gi|447076999|ref|WP_001154255.1|	Unclassified	sdiA	6.5801	4.50595	2.43021	1.15619	1.26299	1.66323	1.49901	26.1587	0	0	10.5341	50.7572	1.17115	1.44589	0.853448	0.544474	1.75849	0.314478	0.443637
YP_695835	Bacitracin	bacA	14.1538	0.209437	0	0	0.210098	0	0	0.756207	0.356463	4.40747	11.5131	0.497188	0.462699	0.036855	0.238011	2.09734	0	0.298187	0.350546
gi|446053031|ref|WP_000130886.1|	Multidrug	mdtD	9.42598	4.60141	2.20595	1.73412	4.64987	2.97232	3.01652	25.9392	0	0	10.4556	68.5389	0.59798	1.90519	1.35856	0.59076	2.69362	0.738623	2.03866
gi|447201648|ref|WP_001278904.1|	Unclassified	cobI	6.70814	4.13426	0.412917	0.884012	2.11431	0.813885	2.48104	22.3423	0	0	10.4781	60.8109	0	1.48354	0.798403	0.582822	2.15125	0.538603	0.852852
YP_002394083	Multidrug	mdtP	15.2239	5.3232	2.99428	2.81347	4.94686	4.71334	5.21489	37.3007	0.055583	0.19636	18.8743	143.166	3.17455	1.67805	1.31133	0.436052	4.36425	0.805937	2.31137
ZP_03051054	Multidrug	mdtM	9.11012	5.94489	1.74168	1.61015	0.19489	3.3647	2.37842	22.4003	0	0.233625	16.1062	93.7157	2.06019	1.53157	1.50132	0.638531	4.38232	0.442564	1.4865
YP_002394085	Multidrug	mdtN	2.01372	0	0	0	1.64777	0.687152	1.45719	0.21966	0	0	0	0.288843	0	0	0	0	0.259467	0.086616	0
YP_001726104	Multidrug	acrB	13.3828	5.30799	2.06073	2.80299	3.55491	3.24488	3.5013	30.185	0.207088	0.823028	16.744	147.31	1.88164	1.45593	0.875728	0.609227	3.73345	0.563005	1.45465
A1ABK4	Multidrug	mdtK	6.63637	3.97497	0.781477	0.988626	3.32292	2.23174	3.38712	19.7238	0	0.628951	10.5162	49.0023	1.23252	0.711744	0.660419	0.071626	2.61072	0.430244	1.53405
A1A9B7	MLS	macB	8.8236	5.75791	1.15311	1.87835	3.4064	2.56314	3.86376	28.8452	0.083761	0.887703	14.8426	83.8044	1.08724	1.54147	0.87619	0.353824	3.89467	0.513824	1.64741
gi|447113812|ref|WP_001191068.1|	Unclassified	gadX	7.23901	0.111676	0.227537	0.182675	2.46461	0.84092	1.26315	0.940852	0.190072	0	1.16143	4.065	0	0	0.042304	0	0.105843	0.158998	0
CP000034.1.gene4477.p01	Unclassified	LuxR	10.5291	4.20663	1.42849	1.44417	2.10995	1.46648	3.42084	28.3147	0.132587	0.936779	13.6571	67.3144	2.06522	0.657989	1.2394	0.160022	3.32245	0.591525	1.93717
gi|446164900|ref|WP_000242755.1|	Unclassified	cAMP-RP	7.30689	4.84386	1.46497	2.311	2.2018	3.32449	2.51785	24.2303	0	0	15.9674	135.113	2.00649	0.852371	0.286703	0.155472	3.80183	0.215514	1.73731
gi|447196024|ref|WP_001273280.1|	Multidrug	mdt	15.0664	6.92788	2.86082	2.40613	4.03982	3.8922	4.94823	36.3792	0.157567	0.556637	19.3707	132.498	3.13607	1.14036	0.4559	0.047543	4.21164	0.234324	1.03301
gi|447120618|ref|WP_001197874.1|	Multidrug	mdtB	9.94407	5.75274	1.57845	1.37179	3.04703	2.79162	3.38868	26.7348	0.130549	0.276714	14.6096	116.487	1.62678	1.53331	1.48766	0.866595	4.20191	0.582433	1.52591
NC_002695.1.912781.p01	Multidrug	acrA	2.94453	5.03854	0.087	0.186257	2.57005	0.910997	1.07958	0.411129	0	0	0.82471	1.757	0	0	0.03235	0	0.323756	0	0
gi|446414955|ref|WP_000492810.1|	Multidrug	acrB	2.59368	3.60703	0.031407	0.084049	2.28857	0.348219	0.738441	0.463809	0	0.185367	0.412233	1.17098	0.817316	0	0.163498	0	0.292193	0.102418	0.058972
NP_288765	Multidrug	bcr	7.65607	5.6316	1.68017	1.88626	2.66327	2.87756	2.72994	23.4323	0.068464	1.45118	10.8173	61.1153	3.19927	1.4157	0.57904	0.206578	3.88874	0.41999	0.846407
YP_695835	Bacitracin	bacA	0.86656	22.3051	8.10779	13.4181	5.9878	22.4732	3.90176	3.97009	40.013	33.056	2.56711	0	48.1207	49.3483	0.436353	0.161334	2.82862	23.0101	16.1251
YP_002394084	Multidrug	mdtO	12.3005	5.90688	2.25957	2.62244	4.47342	4.04355	5.21946	33.3545	0.238424	0.56152	18.3844	119.57	1.85688	1.64337	1.39739	0.743378	4.60264	0.421051	1.36214
A1AHP3	Multidrug	mdtL	14.6085	7.69963	2.44864	2.31016	4.08673	4.95935	4.82477	25.7904	0	0	19.7315	128.819	1.80004	0.974954	1.01853	0.585796	3.62945	0.309343	0.545493
gi|447113812|ref|WP_001191068.1|	Unclassified	gadX	10.0915	5.22642	2.42555	2.15313	0.407781	2.69655	4.48196	38.8599	0.197675	0.698327	19.7575	127.931	4.61858	1.18538	2.77174	0.89467	4.293	0.165358	1.8884
YP_859120	Multidrug	mdtF	15.2775	5.89244	2.61745	2.28174	3.84294	4.07403	4.40163	32.867	0.209482	0.647533	19.0862	127.635	3.94275	1.46193	1.38706	1.10613	4.87022	0.963792	1.95705
gi|446164906|ref|WP_000242761.1|	Unclassified	cAMP-RP	0.603426	12.2507	0	0	0	0	0	0	0	0	0	0	0	0	0	0	0	0	0
gi|545297559|ref|WP_021577764.1|	Multidrug	emrK	12.3749	5.35064	1.92879	1.61583	2.80762	1.75625	3.50527	35.1711	0	0.742422	16.0214	84.8103	2.18232	1.10089	0.686019	0.76093	2.76966	0.820397	1.0235
gi|485663835|ref|WP_001305258.1|	Multidrug	emrB	9.53131	4.38931	2.06136	1.69737	3.27894	3.47706	3.2311	30.4976	0.052983	0.374347	17.3438	139.621	0.275094	1.27087	0.77829	0.319732	4.01255	0.709138	1.63754
Q8FL96	Kasugamycin	ksgA	15.4336	5.82832	2.90941	2.28811	6.08058	2.41381	4.42076	37.1077	0.198396	1.05131	17.5782	172.12	3.09029	1.02561	1.19223	0.478899	3.25912	0.442564	1.95103
gi|447097715|ref|WP_001174971.1|	Multidrug	mdtK	1.37121	1.92629	1.32937	0.745391	0.124669	0.545889	1.15762	11.218	0.21152	0.373618	4.89297	29.109	0	0.306165	0.612006	0.127644	1.41344	0	0.594311
CP001918.1.gene1661.p01	Unclassified	H-NS	0.321534	0.116566	1.78127	3.30504	0	1.02404	0.620458	0.420882	0	0	0	0	0	0	0	0	0	0	0
CAQ86961	Aminoglycoside	aph(6)-I	0	0	23.8494	17.4775	0	1.6522	2.81819	0.06889	0.292261	1.03247	3.9969	9.42103	1.01164	0	0	0.470316	1.51898	0.054329	0
CP004022.1.gene3215.p01	Unclassified	cpxR	0.567169	0.274156	3.00242	5.90467	0	2.58051	1.27686	0.494942	0	0	0	0	0	0	0	0	0	0.975825	0.065553
gi|446164900|ref|WP_000242755.1|	Unclassified	cAMP-RP	0	0.454112	1.85049	3.21889	0	1.80472	0.704999	0.091091	0	0	0	0	0	0	0	0	0.215198	0.35919	0
gi|498913343|ref|WP_010848517.1|	Unclassified	cAMP-RP	0	1.28665	16.7315	12.2153	0	62.3104	74.1256	11.2953	45.7299	7.28113	156.976	80.9717	1.33766	0.106546	0.458725	0	7.17327	14.2958	4.99475
YP_002931998	Bacitracin	bacA	1.29085	0.233987	1.96657	3.50852	0	2.05558	1.08978	0.281615	0	0	0	0	0	0	0	0	0	0.555231	0
YP_002932544	Multidrug	acrB	0.418727	0.197343	3.40225	4.43653	0	1.77177	1.03021	0.420215	0	0	0	0	0	0	0	0	0.172649	0.417849	0.029038
gi|502364505|ref|WP_012772744.1|	Quinolone	qnrB	0	0.140701	2.93844	2.37826	0	53.3274	63.1904	1.86276	0	0	0.104521	0	0	0	0.106598	0	0	0.066775	0
gi|490859158|ref|WP_004721200.1|	Multidrug	mdtH	0.655833	0.237761	2.66439	3.28423	0	1.14383	0.896431	0.333851	0	0	0	0	0	0	0	0	0.187787	0.188062	0
gi|745784185|ref|WP_039077609.1|	Multidrug	emrB	0.344142	0.062381	2.79622	3.16328	0	1.56577	0.747094	0.300317	0	0	0	0	0	0	0	0	0	0.384867	0
ZP_04528247	Bacitracin	bacA	0.471966	0.285171	1.10396	1.24393	0	0	0	0	0	5.14392	0.169473	0	0	0.08029	1.72841	0	0	0	0
ZP_02511926	Tetracycline	tetM	0.603426	0.56878	1.02517	1.28824	10.0948	1.1531	4.36658	5.79241	21.2974	6.31364	5.07027	0.276972	3.47975	12.996	0	21.7049	0.497609	4.402	4.93783
gi|446590225|ref|WP_000667571.1|	Multidrug	mdtC	3.69231	0.077825	0.317133	0.186711	3.51315	0.488351	0.95276	0.41213	0.052983	0.093587	0.670626	19.3125	0.275094	0.13147	0.023585	0	0.236033	0.073869	0.059547
ZP_04528247	Bacitracin	bacA	0	0.749476	1.11592	1.57175	0.636172	2.46002	0.690455	3.8163	0.196248	0.346642	0.171309	0	0	0	2.22759	0.29607	0.109282	0	0.606541
CAJ00301	Tetracycline	tetM	0.653563	0.18955	0.386206	0.826827	5.94213	2.08151	4.28797	5.76037	22.0991	13.6764	2.88658	0.299985	3.76887	20.6134	6.60592	25.6985	2.38037	4.90268	7.29698
AF191564.1.gene5.p01	Sulfonamide	sul1	0	0	2.73085	2.11468	0	46.3827	61.0957	8.09997	0	0.685856	10.931	9.20686	0	0.08029	0.259262	0.702955	4.91907	17.8646	1.69103
AF326777.3.gene22.p01	Tetracycline	tetD	0	0	0.234085	0.250576	0	1.44186	1.83459	1.1062	0	0	0.512078	0.363651	1.01527	0	0	0	0.108889	0	0
YP_002931998	Bacitracin	bacA	0.766089	0	1.55616	2.72583	0	0.174278	0.554366	0	0	0	0	0	0	0	0	0	0	0	0
gi|446601676|ref|WP_000679022.1|	Multidrug	mdtA	1.73426	0	0	0	1.13527	1.26248	0.669313	0	0	0	0	0.398011	0	0	0	0	0	0	0
NC_002695.1.916585.p01	Multidrug	mdtB	1.78238	0	0	0	0.092601	0.231699	1.47404	0	0	0	0	0.584364	0	0	0	0	0	0	0
ABG77519	Aminoglycoside	aac(6')-I	0	0	3.94811	3.06038	0	62.8931	79.3122	1.28671	0	0	0	0	0	0	0.050623	0	0.189987	0.126844	0
ZP_03064089	Bacitracin	bacA	10.9333	5.22746	2.7505	2.06725	3.91856	3.31629	2.98121	26.3414	0	1.03619	15.1916	82.1851	4.56874	0.970415	1.13155	0.354006	4.13779	0.708819	2.08779
NC_002758.1119995.p01	Bleomycin	bleO	0	0	0	0	0	0	0	9.61013	0	0	0.777911	0	0	0	0.396685	0	0	0	0
AAY43141	Trimethoprim	dfrA17	0	0	0	0.165071	0	0	0	9.74677	0	0	0.112447	17.0089	0	0	0.344044	0	0	0.071838	0
ZP_04003442	Multidrug	emrE	1.65602	0	0.244645	0.26188	1.80676	0.753456	0.958677	3.03478	0	0.721954	1.96232	17.8626	1.06108	1.26774	1.09163	0	1.13801	0.341906	0.229681
CAP58293	Tetracycline	tet40	0	3.17072	1.06359	0.59034	0.271525	0.436749	0.565999	22.9433	0	0	0	0	1.70851	0	0	0	0	0.036702	0
ZP_03063004	Aminoglycoside	aadA	0	0	0	0	0	0	0	2.092	0	0	0.48421	34.7299	0	0	0	0.11158	1.1326	0	0
JQ861959.1.gene7.p01	Aminoglycoside	ant(9)-I	0.163149	2.89819	4.15761	4.57951	0.356	3.0434	1.88895	3.13219	1.91269	7.11259	1.93325	0	0	1.12406	10.6649	0.242997	1.62567	2.07718	3.62046
CAJ75672	MLS	lnuA	0	0	0	0	0	0	0	0	0	2.96358	0	1.24809	0	4.30197	0	5.87242	0.280289	3.3684	3.58274
CAJ75672	MLS	lnuA	0	0	0	0	0	0	0	0	0.610793	0	0	0	0	0.06315	0	0.184295	0	2.63985	1.45873
gi|921479759|emb|CTS89273.1|	Multidrug	mdtA	8.6941	4.06244	1.60549	1.41306	2.10789	1.84597	1.9107	25.1634	0.178818	1.05285	13.7363	63.9603	1.23792	1.33113	1.11437	0.467609	3.05367	0.598335	1.90922
YP_695835	Bacitracin	bacA	8.7228	0.368935	0	0	0	0.13229	0	0.634332	0	10.1407	31.9483	3.33647	0	0	0.559024	1.46159	0.299715	0.550284	1.10899
CP004022.1.gene3215.p01	Unclassified	cpxR	0	0	0.069824	0.298971	0	0	0	0	1.16654	7.00574	0.10183	20.8264	0	0	0	0	0	0.26022	0.262211
YP_002385033	Multidrug	mdtL	0	0	0.382798	0.512207	0.18847	0.235787	0.375012	6.44444	0	0	2.37263	38.9513	0	0	0	0	0.801296	0	0
ZP_02863325	Tetracycline	tetA	8.89373	10.8108	13.2934	22.4617	9.58916	57.6503	21.3012	13.9244	99.8763	130.003	89.1567	22.6923	117.994	88.6436	16.8982	18.3503	11.3247	73.1248	53.7304
ZP_03063004	Aminoglycoside	aadA	0	0	0	0	0	0	0	0	0	0	0	0.953725	0	0	0	0	0	0	0
B7LQD5	Bacitracin	bacA	0.160767	0	0	0	0.175401	0.073146	0	0.420882	0	0	0.692738	55.3439	0	0	0	0	0.110479	0.221282	0
YP_002385033	Multidrug	mdtL	2.24174	0.08127	0.165587	0.088626	1.42672	0.305984	0.594803	4.74393	0	0	3.44122	119.359	1.07728	0	0	0.083472	0.462156	0.03857	0.116594
CP001918.1.gene1661.p01	Unclassified	H-NS	0	0	0.356254	0	0	0	0	0	0	2.10263	0	6.27231	0	0	0	0	0	0	0
YP_002383660	Multidrug	mexE	0	0	0	0	0.043064	0	0	0	0.146131	0	0.191341	58.0209	0.758727	0	0	0	0.081374	0	0
ZP_03064581	Multidrug	mdtN	1.92359	0.139473	0.21313	0.456289	0.979387	0.787674	1.02077	9.23244	0	0.838602	4.04072	48.7816	0	0.392686	0.317001	0.143251	1.98283	0.132383	0.200093
ABB43029	Aminoglycoside	aac(3)-IV	0	0	0	0.129963	0	0	0	0	0	0	0.885309	5.28108	0	0	0	0	0.112952	0	0.227967
gi|447097715|ref|WP_001174971.1|	Multidrug	mdtK	0	0	0	0	0	0	0	0	0	0	0.259304	4.41945	0	0	0	0	0	0	0
ACD76089	Aminoglycoside	aph(3')-I	0	0	0	0	0	0	0	0	0.199855	0	0.174458	17.6544	1.55651	0	0	0	0.333873	1.05882	0
gi|445972720|ref|WP_000050575.1|	Multidrug	mdtG	0	0	0	0	0	0	0	0	0	0	0.141228	4.51316	0	0	0	0	0	0	0
YP_002385298	Multidrug	mdtN	0	0	0	0	0	0	0	0	0	0	0.137943	66.1231	0	0	0	0	0	0	0
YP_002385300	Multidrug	mdtP	0	0	0	0	0	0	0	0	0	0	0.097639	66.0445	0	0	0	0	0	0	0
CP001138.1.gene1383.p01	Unclassified	H-NS	0	0	0	0	0	0	0	0	0	0	0.343859	36.2623	0	0	0	0	0	0	0
ABB77558	Trimethoprim	dfrA14	0	0	0	0.108168	0	0	0	0	0	0	2.35789	47.4079	0	0	0	0	0.37604	0.188296	0
YP_002931998	Bacitracin	bacA	0	0	0.119186	0.191374	0	0	0	0	0.298685	4.57238	0	10.1836	0	0	0	0	0	0	0.223792
gi|445947001|ref|WP_000024856.1|	Multidrug	mdtF	0.163149	0	0	0	0	0	0	0	0	0	0.527251	6.17802	1.04536	0	0	0	0.168173	0	0
YP_002384189	Multidrug	mdtM	0	0	0	0.042372	0.077956	0.048764	0.155114	0.327352	0	0	0.577282	60.0174	0	0.027349	0.029438	0.039908	0.147305	0	0.185813
gi|447201650|ref|WP_001278906.1|	Unclassified	cobI	0	0	0	0	0.243959	0.101736	0	0.292694	0	0	0.60219	35.922	0	0	0	0	0.921965	0.307773	0.077532
YP_002384075	Multidrug	TolC	0	0	0	0	0	0	0.043192	0	0	0	0.096448	60.8213	0	0	0	0	0.09229	0	0.093133
AY463797.7.gene28.p01	Tetracycline	tetA	0	0	1.16207	0	0	11.0946	10.2459	2.40253	0.970725	0	34.3184	29.7869	0	0	0.216051	0	0.270278	4.60148	0.545493
AF024666.2.gene33.p01	Chloramphenicol	cep	0	0	0	0	0	0	0.195859	0	0.626274	1.32746	0.218675	1.39762	0	0	0	0.22676	0	0.069852	0.140772
gi|693058885|ref|WP_032226462.1|	Multidrug	mdtP	0	0	0	0	0	0	0	0	0	0	0.302889	7.31325	0	0	0	0	0	0	0
gi|445947001|ref|WP_000024856.1|	Multidrug	mdtF	0	0	0	0	0	0	0	0	0	0	0.761271	2.97338	0	0	0	0	0	0	0
gi|545264482|ref|WP_021557459.1|	Beta_lactam	blaC	0	0	0	0	0	0	0	0	0	0	0.062768	7.22106	0	0	0	0	0	0	0
YP_002382152	Multidrug	mdt	0	0	0	0	0	0	0	0	0	0	0.346369	30.9926	0	0	0	0	0	0	0
ACB18769	Multidrug	emrD	11.5524	6.45829	2.15324	2.09151	5.26146	3.48769	5.52101	34.0594	0.133237	0	25.1219	250.259	3.11301	1.10202	1.24547	0.96484	4.37745	0.260061	2.20871
gi|446164900|ref|WP_000242755.1|	Unclassified	cAMP-RP	0	0.302741	0.385519	0.247607	0	0	0	0	0.7729	2.27535	0.33734	10.7803	0	0	0	0	0	0.071838	0
NP_288765	Multidrug	bcr	0	0	0	0	0.162639	0	0	0.19513	0	0	0	5.38831	0	0	0	0	0.07683	0	0
YP_002382193	MLS	macB	0	0	0	0	0	0	0	0	0	0	0.073116	40.5781	0	0	0	0	0	0	0
YP_002383389	Multidrug	bcr	1.88628	0	0.163919	0.1316	1.12987	0.302901	0.107056	1.93655	0	0.241864	0.896459	50.1655	0	0.254826	0	0.165262	0.495624	0	0.076946
gi|486392102|ref|WP_001603016.1|	Polymyxin	arnA	0	0	0	0	0	0	0	0	0	0	0.266587	3.78633	0	0	0	0	0	0	0
ZP_02346647	Multidrug	acrB	0	0	0	0	0	0	0	0	0	0	0.29715	62.8678	0	0.064975	0.023312	0	0	0.014603	0
gi|291431185|gb|EFF04178.1|	Multidrug	emrD	0.24817	0.179939	0.137484	0.049056	0.13538	0.338737	0.059861	0.974548	0	0	1.00252	11.8181	0.39753	0.063328	0.102244	0.046204	0.042635	0.042698	0
B7LQA4	Multidrug	mdtK	0	0	0	0	0	0.04376	0	0	0	0	0.414433	51.4304	0	0	0	0	0.099141	0	0
gi|445947001|ref|WP_000024856.1|	Multidrug	mdtF	0	0	0	0	0	0	0	0	0	0	0	3.48603	0	0	0	0	0	0	0
gi|693154792|ref|WP_032291441.1|	Unclassified	sdiA	0	0	0	0	0	0	0	0	0	0	0	37.5094	0	0	0	0	0	0	0
gi|445947001|ref|WP_000024856.1|	Multidrug	mdtF	0	0	0	0	0	0	0	0	0	0	0.284147	7.2643	0	0	0	0	0	0	0
B7LM76	Polymyxin	arnA	0	0	0	0	0	0	0	0	0	0	0.107684	46.6474	0	0.034011	0	0	0	0.045863	0.046214
ABW72062	Multidrug	acrB	0	0.060721	0.29383	0.082771	0	0	0	0	1.31768	1.55165	0.045107	12.6849	0	0	0	0	0	0.086451	0
YP_002384138	Multidrug	mdtF	0	0	0.031347	0	0	0	0	0	0	0	0.320008	54.9302	0	0	0	0	0.029163	0.029206	0.058859
YP_002384137	Multidrug	mdtE	0	0	0	0	0	0	0	0	0.070415	0	0.184401	67.1783	0	0	0	0	0	0.078538	0
gi|446052970|ref|WP_000130825.1|	Multidrug	mdtD	0.27998	0.406007	0.068936	0.110689	0.271525	0.042462	0.180091	0.407209	0	0	2.06097	49.7978	0	0.214334	0.051266	0	0.160335	0	0.03236
gi|507088457|ref|WP_016159183.1|	Multidrug	acrB	0	0	0	0	0	0	0.073787	0	0	0	0	4.21229	0	0	0	0	0	0	0
YP_002382998	Multidrug	mdtH	0	0	0	0	0	0	0	0	0	0	0.234334	32.3254	0	0	0	0	0.149487	0	0
B7LT82	Multidrug	mdtG	0	0	0	0	0	0	0	0	0	0	0.406073	35.7169	0	0	0	0	0	0.148243	0
ZP_03064513	Multidrug	mdtO	0	0	0	0	0	0	0	0	0	0	0.38475	2.73229	0	0	0	0	0	0	0
gi|490859158|ref|WP_004721200.1|	Multidrug	mdtH	0	0.11888	0.161478	0.12964	0	0	0	0	0.472115	1.19131	0.470993	7.77653	0	0	0	0	0	0	0.113701
gi|446601675|ref|WP_000679021.1|	Multidrug	mdtA	0.579607	0	0.035677	0.114573	0.351315	0.043952	0	1.09589	0.119212	0	0.468282	54.0946	0.928443	0.024651	0	0	0.16596	0	0.033495
CP000034.1.gene3834.p01	Unclassified	cpxR	0.189056	0	0	0	0	0	0	0	0	0	0	64.4317	0	0	0.051927	0	0	0.13011	0.196658
gi|510925315|ref|WP_016246058.1|	Unclassified	sdiA	0	0	0	0	0	0	0	0	0	0	0	3.63413	0	0	0	0	0	0	0
gi|446014368|ref|WP_000092223.1|	Multidrug	mdtH	0	0	0	0	0	0	0	0	0	0	0	2.83444	0	0	0	0	0	0	0
ABB70054	Tetracycline	tetM	0.451796	31.5707	24.4868	16.7006	35.1618	23.5878	29.2606	47.2621	45.7187	13.0489	16.9734	0.259218	17.369	12.5088	59.0363	6.35062	38.2271	65.645	41.7876
gi|503790738|ref|WP_014024732.1|	Multidrug	mdt	0	0	0	0	0	0	0	0	0.081135	0	0	0	0	1.47638	0	0	0	0.045247	0.091187
AM180355.1.gene636.p01	Tetracycline	tetM	0	0	0.0561	0.060052	0	0.760211	0.879339	0.331384	0.281176	0.662206	0.327259	0	0.973264	3.37219	0	0.05656	0	0.156805	0
gi|503791050|ref|WP_014025044.1|	Multidrug	mdt	0	0	0	0	0	0	0	0	0	0	0	0	0	0.938956	0	0	0	0	0
NP_834207.1	Tetracycline	tetK	0.552007	0.720433	1.264	1.35305	0	1.35622	1.75758	11.1757	0	0.481303	0	0	0	11.6351	2.18326	0	0.758676	0	1.07185
JQ861959.1.gene7.p01	Aminoglycoside	ant(9)-I	0.652594	3.07563	5.30246	4.64401	0.356	4.89914	1.73154	3.55931	0.201336	0	0.703001	0	1.04536	2.49792	0.806592	0	0	0	0.339418
ZP_04528247	Bacitracin	bacA	0	0	0	0.068563	0	0	0	0	0	0	0	0	0	0	0.809767	0	0	0	0
AF024666.2.gene33.p01	Chloramphenicol	cep	0	0	0	0	0	0	0	0	0.273169	1.93005	0.119228	1.27004	0	0	0	0.824235	0	0	0.153506
BAC00986	Aminoglycoside	aadD	0	0	0	0	0	0	0	0	0.21152	0	0	0	0	0	0	9.95624	0	0.05898	0
